# Supplementary material for: Seropositivities against brucellosis, coxiellosis, and toxoplasmosis and associated factors in pregnant women with adverse pregnancy outcomes: A cross-sectional study
Source: PubMed Central journal article supplement (PMC6508713; doi:10.1371/journal.pone.0216652), 2019-05-09
Supplement: pone.0216652.s001.pdf [file pone.0216652.s001.pdf]

# Recording form

Project: Seropositivities against brucellosis, coxiellosis, and toxoplasmosis and associated factors in pregnant women with adverse pregnancy outcomes

Date of data collection ..... / ..... / .....

**Instruction: Please check the appropriate box and fill in the information of pregnant woman**

## Section 1: General information

1. Date of birth (dd/mm/yy) ..... / ..... / ..... Age ..... years wid [ ] [ ] [ ] age [ ] [ ] [ ]
2. Religion  1. Buddhist  2. Muslim  3. Christianity  4. Others, please specify..... relig [ ] [ ]
3. Educational attainment  1. Primary school or lower  2. Secondary school  3. College or university edu [ ] [ ]
4. Occupation  1. No/housewife  2. Agricultural farmer  3. Livestock farmer  4. Fisherman occ [ ] [ ] [ ]  
 5. Laborer  6. Salesperson  7. Private officer  
 8. Others, please specify.....
5. Home animal  1. No  2. Cat  3. Dog  4. Caged bird  5. Chicken pet [ ] [ ] [ ]  
 6. Duck  7. Goat  8. Others, please specify.....

## Section 2: Obstetric information

6. Gestational age at present ..... weeks ga [ ] [ ] [ ]
7. Gestational age at date of blood collection ..... weeks bldga [ ] [ ] [ ]
8. Gravida ..... grav [ ] [ ] [ ]
9. Parity ..... par [ ] [ ] [ ]
10. Have any of following history?
- 10.1 Miscarriage  1. No  2. Yes ..... times abhis [ ] [ ]
- 10.2 Stillbirth  1. No  2. Yes ..... times sbhis [ ] [ ]
- 10.3 Preterm birth  1. No  2. Yes ..... times pthis [ ] [ ]
- 10.4 Low birth weight newborn (<2,500 grams)  1. No  2. Yes ..... times lbwhis [ ] [ ]
11. Plan of delivery, please specify the hospital name..... brthhosp [ ] [ ] [ ]

## Section 3: History of goat and raw goat products exposure

12. Performing any activity in goat raising  1. Never  2. Ever gtrear [ ] [ ]
13. Ingestion of raw goat meat or milk  1. Never  2. Ever csmrw [ ] [ ]
14. Physical contact with raw goat meat or milk  1. Never  2. Ever ctrw [ ] [ ]

## Section 4: Follow-up pregnancy outcome

15. Pregnancy outcome [ ] 1. Miscarriage at GA ..... weeks [ ] 2. Stillbirth at GA ..... weeks pregoc [ ] [ ] [ ]  
[ ] 3. Preterm at GA ..... weeks [ ] 4. LBW at GA ..... weeks pregocga [ ] [ ] [ ]

## Section 5: Serological results

- Specimen ID ..... LAB ID .....
16. ELISA  Toxoplasmosis  1. Negative  2. Positive (note:.....) toxo [ ] [ ] [ ]  
 Brucellosis  1. Negative  2. Positive (note:.....) bru [ ] [ ] [ ]  
 Coxiellosis  1. Negative  2. Positive (note:.....) cox [ ] [ ] [ ]

hospid [ ] [ ] [ ] [ ] wid [ ] [ ] [ ] [ ]  
dd/mm/yy [ ] [ ] [ ] / [ ] [ ] [ ] / [ ] [ ] [ ]
