# Supplementary material for: Seropositivities against brucellosis, coxiellosis, and toxoplasmosis and associated factors in pregnant women with adverse pregnancy outcomes: A cross-sectional study
Source: PubMed Central journal article supplement (PMC6508713; doi:10.1371/journal.pone.0216652), 2019-05-09
Supplement: pone.0216652.s002.pdf [file pone.0216652.s002.pdf]

## แบบบันทึกข้อมูล

โครงการวิจัยเรื่อง ความชุกและปัจจัยที่เกี่ยวข้องต่อการพบผลบวกทางซีรัมต่อโรค布鲁เซลโลซิส โรคไข้ว และโรคทอกโซพลาสโมซิส  
ในหญิงตั้งครรภ์ที่มีผลลัพธ์อันไม่พึงประสงค์ของการตั้งครรภ์

วันที่เก็บข้อมูล...../...../.....

คำชี้แจง: กรุณาทำเครื่องหมาย  ลงใน  หน้าข้อความและเติมข้อมูลที่ตรงกับหรือใกล้เคียงกับความเป็นจริง

### ตอนที่ 1: ข้อมูลทั่วไปของหญิงตั้งครรภ์

1. เกิดวันที่.....เดือน.....พ.ศ..... อายุ.....ปี age [ ][ ]
2. ศาสนา  1.พุทธ  2.อิสลาม  3. คริสต์  4.อื่นๆ โปรดระบุ..... relig [ ]
3. ระดับการศึกษาสูงสุด  1.ประถมศึกษาหรือไม่ได้รับการศึกษา  2.มัธยมศึกษา  3.อนุปริญญาหรือปริญญาตรีขึ้นไป edu [ ]
4. อาชีพปัจจุบัน  1.ไม่มีอาชีพ/อยู่บ้านเฉยๆ  2.เกษตรกรทำสวน ทำไร่  3.เลี้ยงสัตว์  4.ประมง occ [ ][ ]  
 5.รับจ้าง  6.ค้าขาย  7.พนักงานเอกชน  
 8.อื่นๆ โปรดระบุ.....
5. สัตว์เลี้ยงในบ้าน  1.ไม่มี  2.แมว  3.สุนัข  4.นก  5.ไก่ pet[ ][ ]  
 6.เป็ด  7.แพะ  8. อื่นๆ โปรดระบุชนิด .....

### ตอนที่ 2: ข้อมูลเกี่ยวกับการตั้งครรภ์ของหญิงตั้งครรภ์

6. อายุครรภ์ปัจจุบัน .....สัปดาห์ ga [ ][ ]
7. อายุครรภ์ที่ได้รับการเจาะเลือดตรวจ .....สัปดาห์ bldga [ ][ ]
8. จำนวนครั้งที่เคยตั้งครรภ์ (รวมครรภ์ปัจจุบันด้วย) ..... ครั้ง grav [ ][ ]
9. จำนวนครั้งที่เคยคลอดบุตร ..... ครั้ง par [ ][ ]
10. เคยมีประวัติการตั้งครรภ์/คลอดที่ผ่านมาต่อไปนี้หรือไม่
- 10.1 แท้ง  1.ไม่มี  2.มี จำนวน ..... ครั้ง abhis [ ]
- 10.2 ทารกเสียชีวิตก่อนคลอด  1.ไม่มี  2.มี จำนวน ..... ครั้ง sbhis [ ]
- 10.3 คลอดก่อนกำหนด  1.ไม่มี  2.มี จำนวน ..... ครั้ง pthis [ ]
- 10.4 ทารกน้ำหนักน้อยกว่า 2,500 กรัม  1.ไม่มี  2.มี จำนวน ..... ครั้ง lbwhis [ ]
11. ท่านวางแผนจะคลอดที่ใด โปรดระบุชื่อสถานพยาบาลและอำเภอ..... brthhosp [ ]

### ตอนที่ 3: ประวัติการสัมผัสแพะและผลิตภัณฑ์จากแพะ

12. เลี้ยงแพะหรือทำกิจกรรมที่เกี่ยวข้องกับการเลี้ยงแพะ  1.ไม่เคย  2.เคย gtrear [ ]
13. รับประทานเนื้อแพะดิบหรือนมแพะดิบ  1.ไม่เคย  2.เคย csmrw [ ]
14. สัมผัสเนื้อแพะดิบหรือนมแพะดิบ  1.ไม่เคย  2.เคย ctrw [ ]

### ตอนที่ 4: ผลการติดตามผลลัพธ์การตั้งครรภ์ของหญิงตั้งครรภ์

15. สรุปผลลัพธ์ [ ] 1. Miscarriage ที่อายุครรภ์ ..... สัปดาห์ [ ] 2. Stillbirth ที่อายุครรภ์ ..... สัปดาห์ pregoc [ ]  
[ ] 3. Preterm ที่อายุครรภ์ ..... สัปดาห์ [ ] 4. LBW ที่อายุครรภ์ ..... สัปดาห์ pregocga [ ][ ]

### ตอนที่ 5: ผลตรวจทางซีรัมวิทยา

Specimen ID ..... LAB ID .....

16. ELISA  Toxoplasmosis  1. Negative  2. Positive (note:.....) toxo [ ]
- Brucellosis  1. Negative  2. Positive (note:.....) bru [ ]
- Coxiellosis  1. Negative  2. Positive (note:.....) cox [ ]

hospid [ ][ ][ ] wid [ ][ ][ ]  
dd/mm/yy [ ][ ]/[ ][ ]/[ ][ ]
